# Supplementary material
Source: PubMed Central journal article supplement (PMC10811747)

**A**

AGS-BYLR CI.1

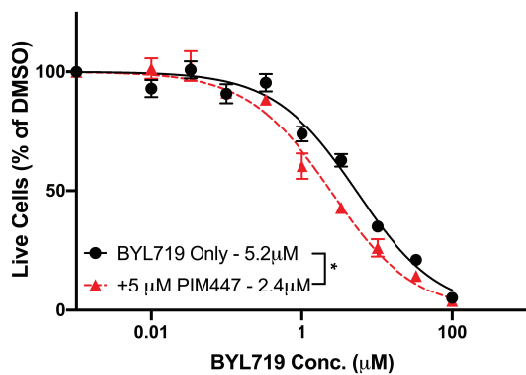

AGS-BYLR CI.2

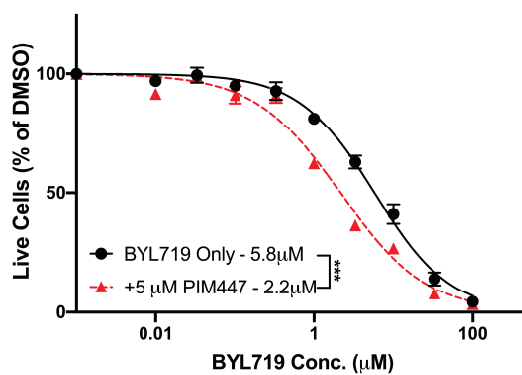**B**

AGS Parental

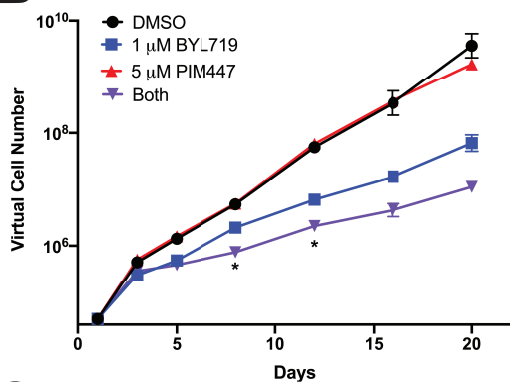

AGS-CBFB KO CI.1

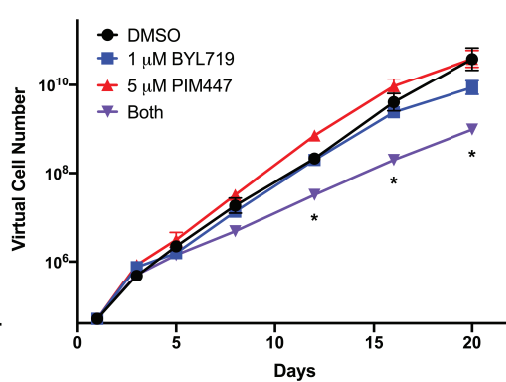

AGS-CBFB KO CI.2

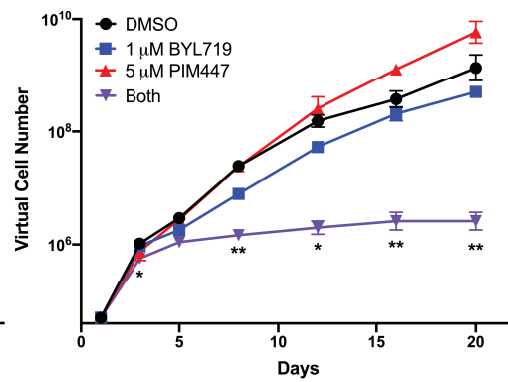**C**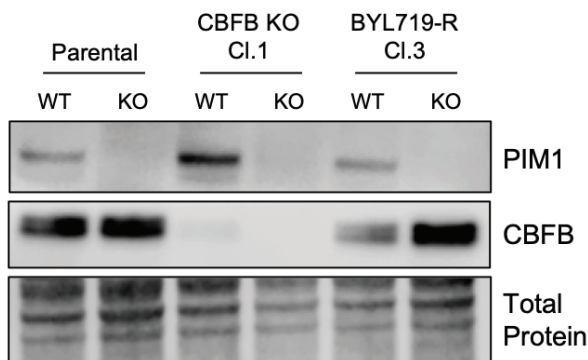**D**

AGS Parental

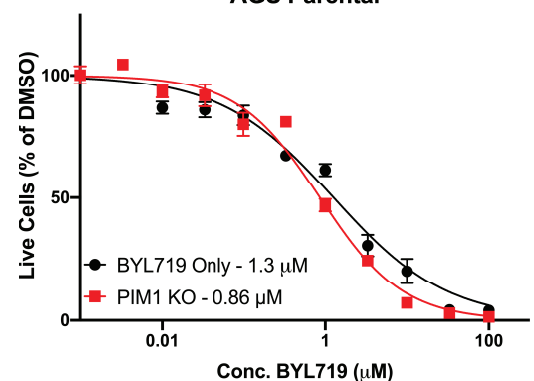

AGS-CBFB KO CI.1

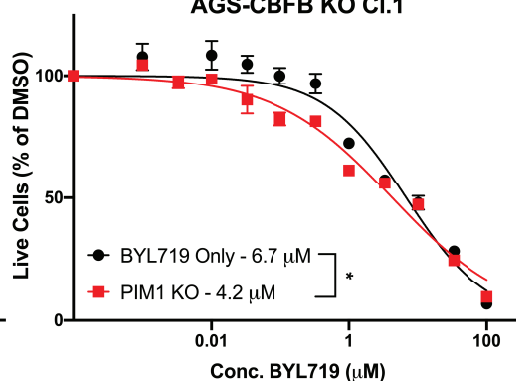

AGS-BYL719-R CI.3

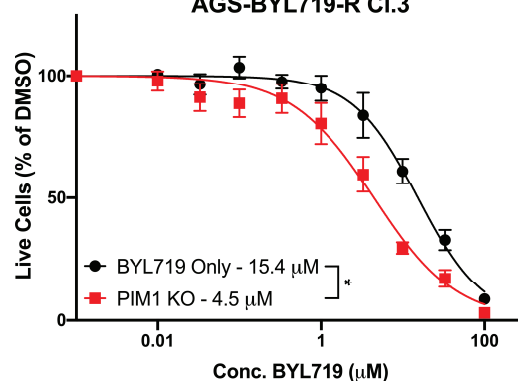

Supplement: NIHMS1917606-supplement-7.pdf [file NIHMS1917606-supplement-7.pdf]
