# Supplementary material
Source: PubMed Central journal article supplement (PMC10811747)

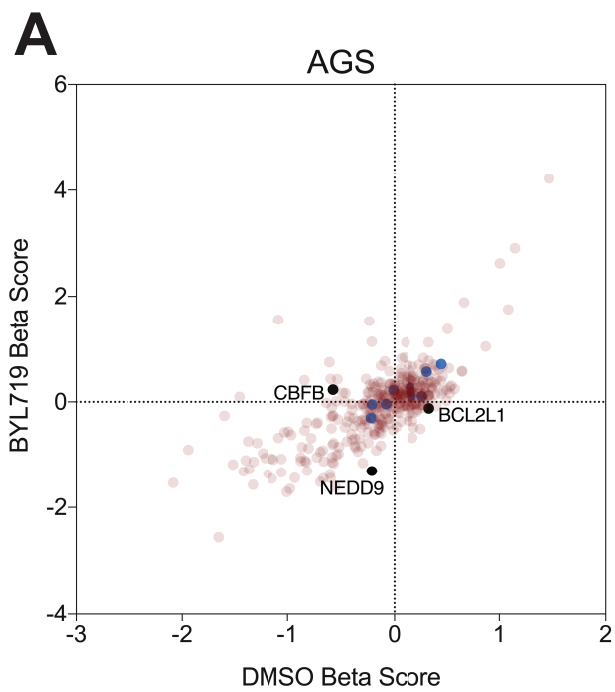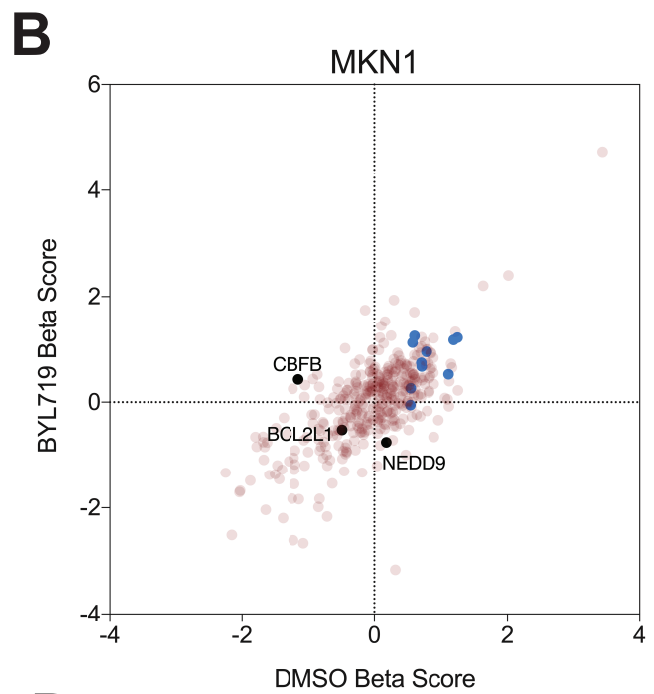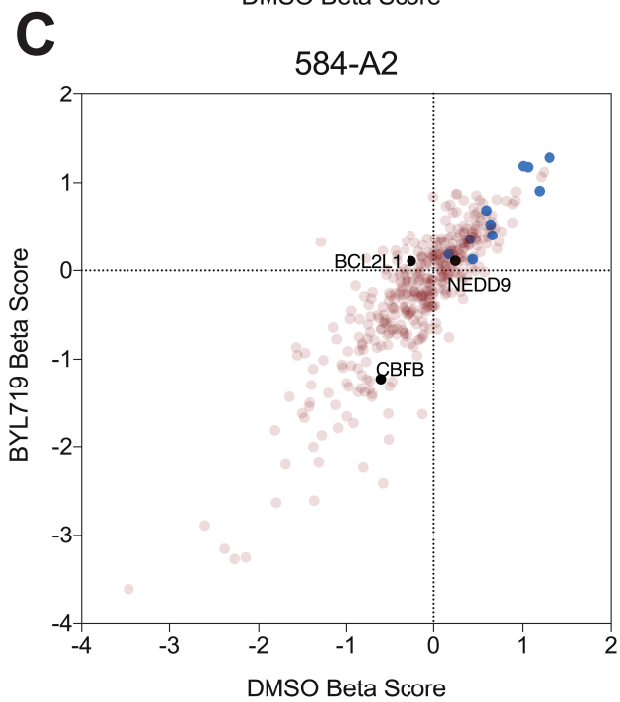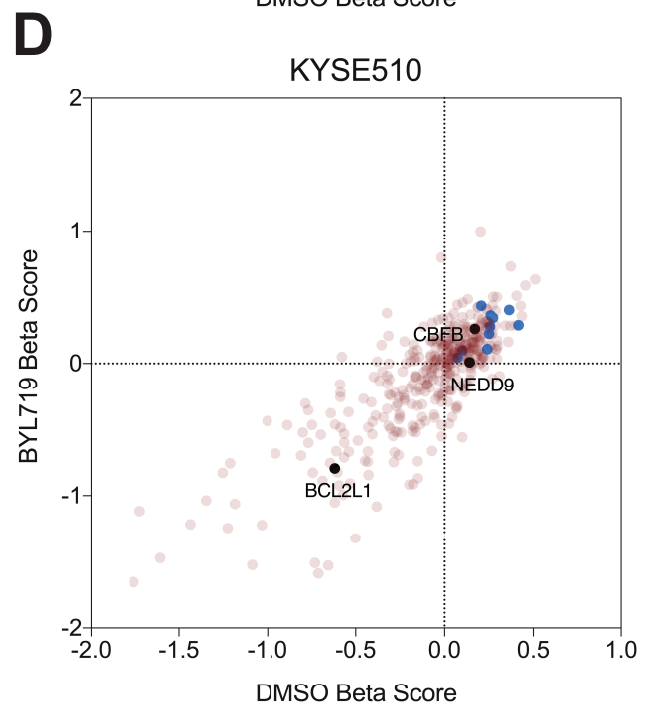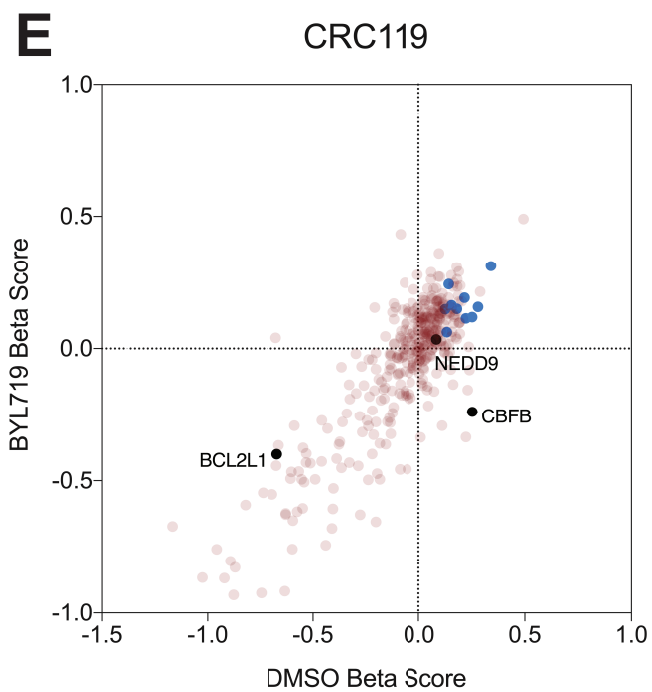

Supplement: NIHMS1917606-supplement-1.pdf [file NIHMS1917606-supplement-1.pdf]

**A**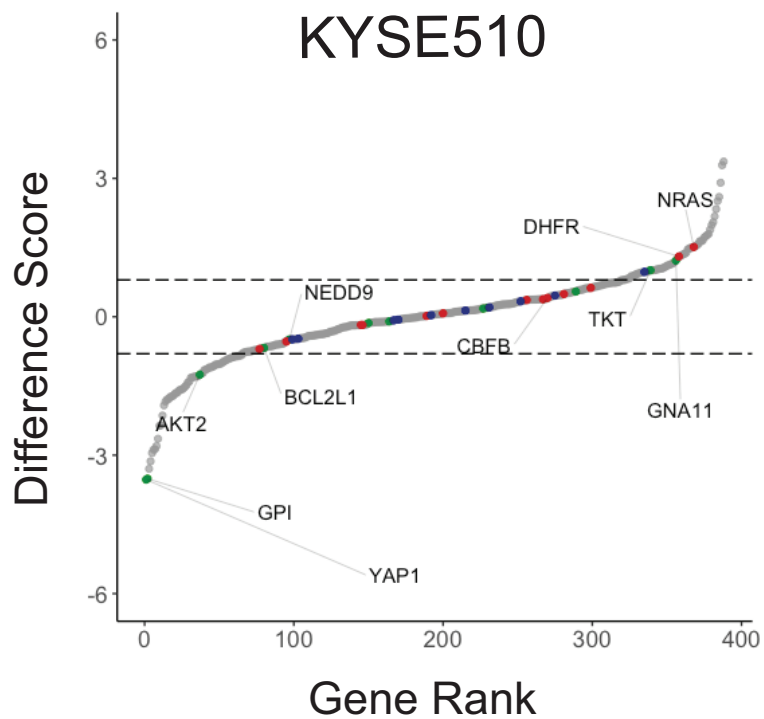**B**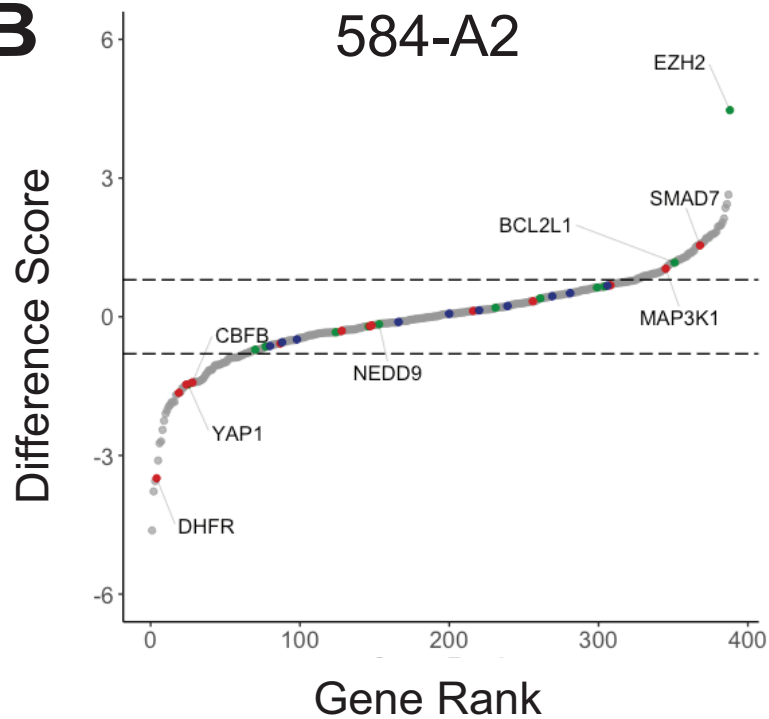**C**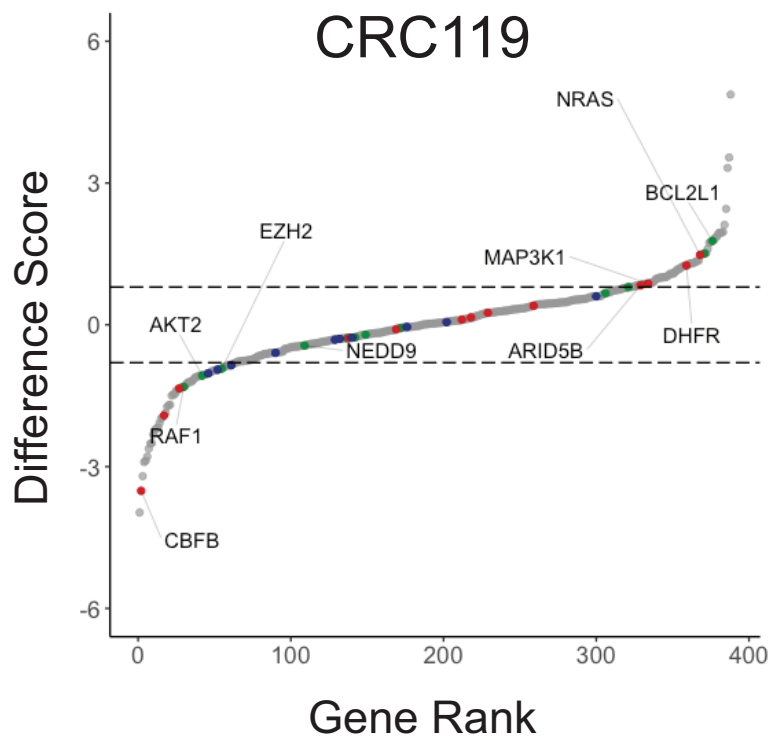

Supplement: NIHMS1917606-supplement-2.pdf [file NIHMS1917606-supplement-2.pdf]

**A****Dasatinib**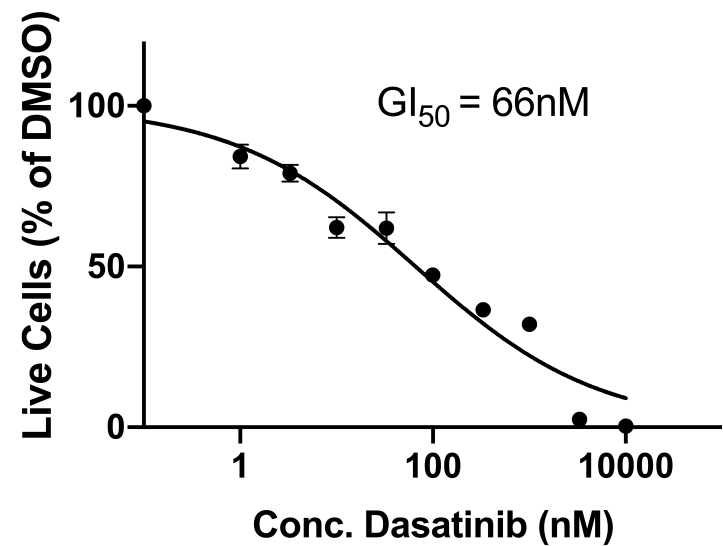**B****AGS**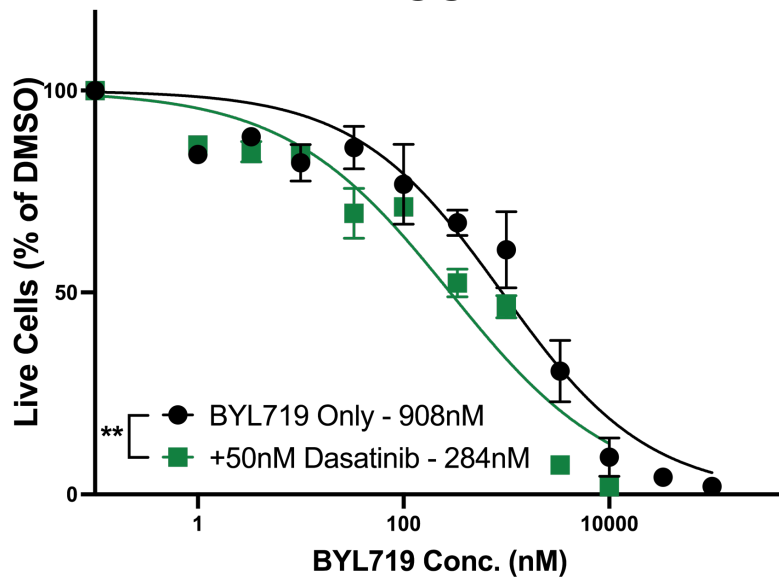

Supplement: NIHMS1917606-supplement-3.pdf [file NIHMS1917606-supplement-3.pdf]

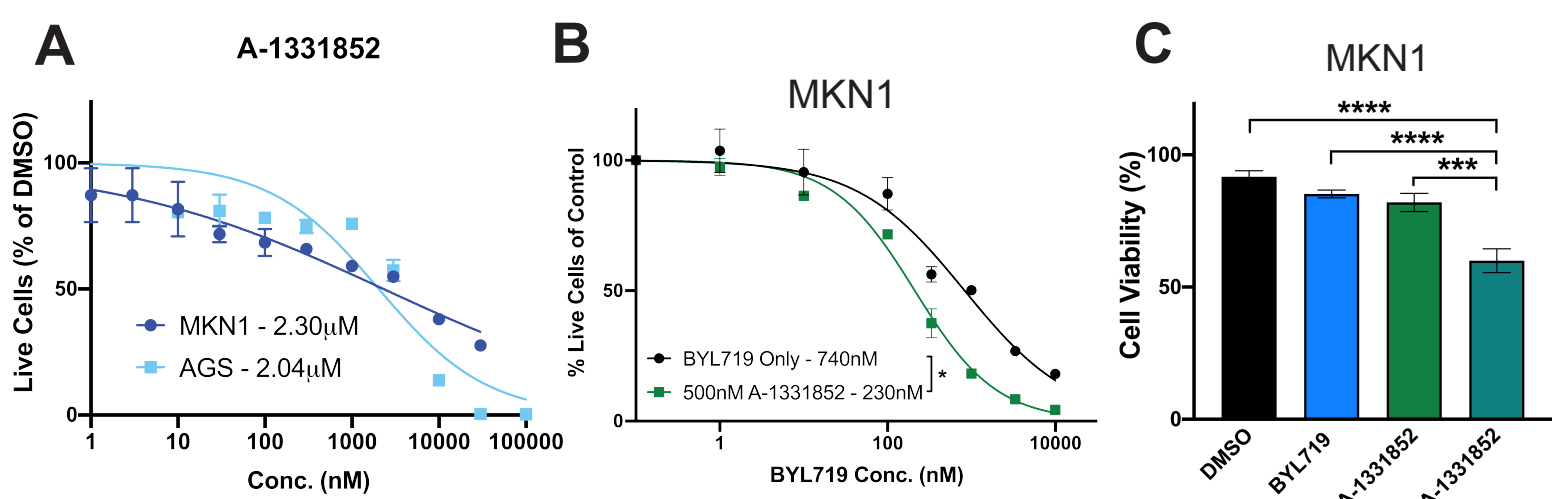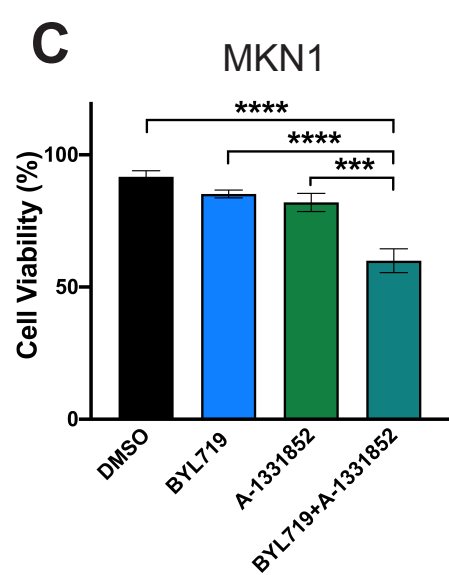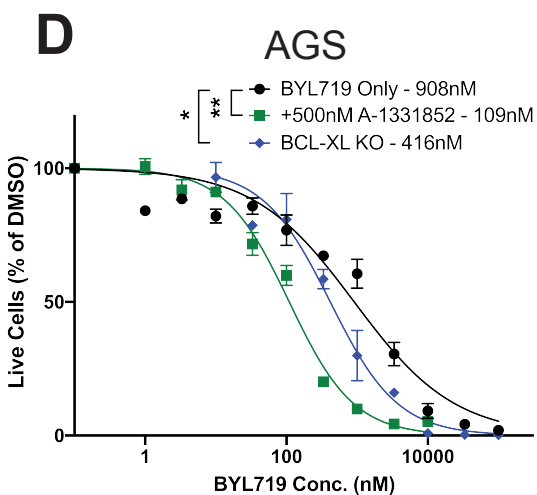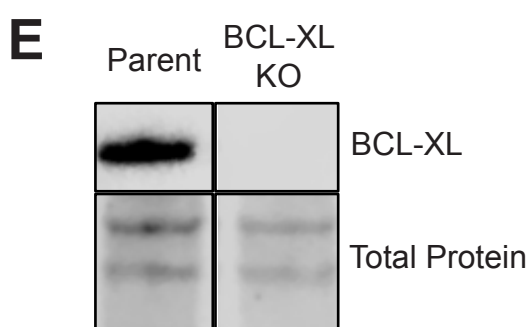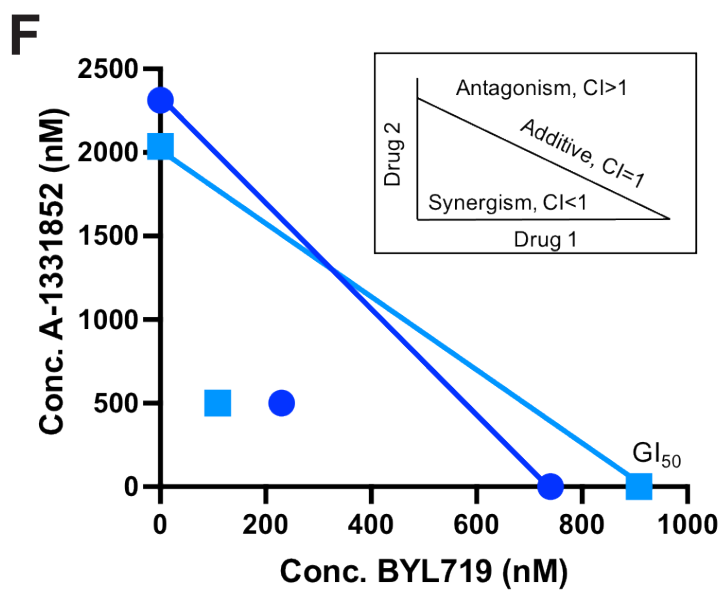

| Cell Line | BYL719 (nM) | A-1331852 (nM) | CI    |
|-----------|-------------|----------------|-------|
| MKN1      | 230         | 500            | 0.527 |
| AGS       | 109         | 500            | 0.366 |

Supplement: NIHMS1917606-supplement-4.pdf [file NIHMS1917606-supplement-4.pdf]

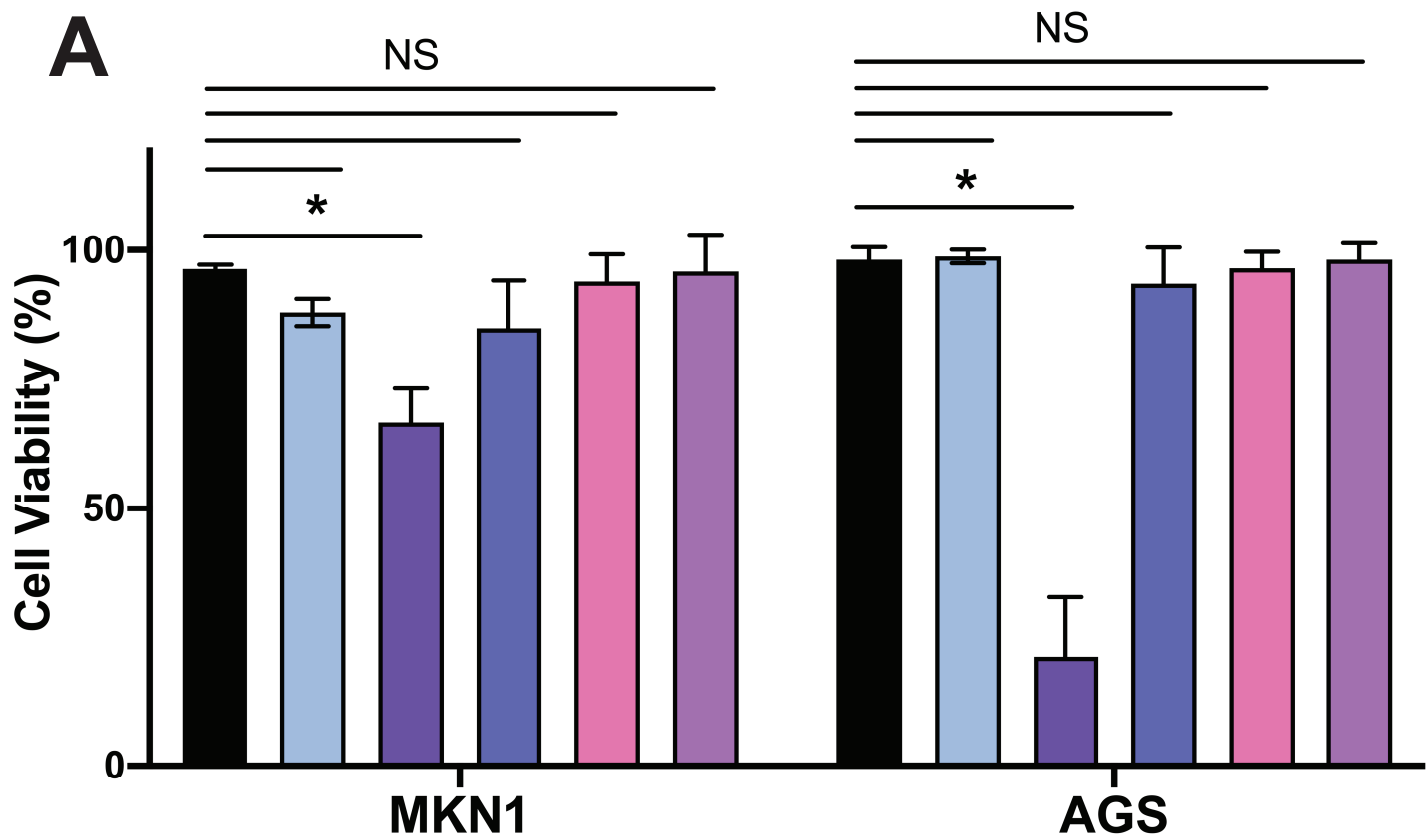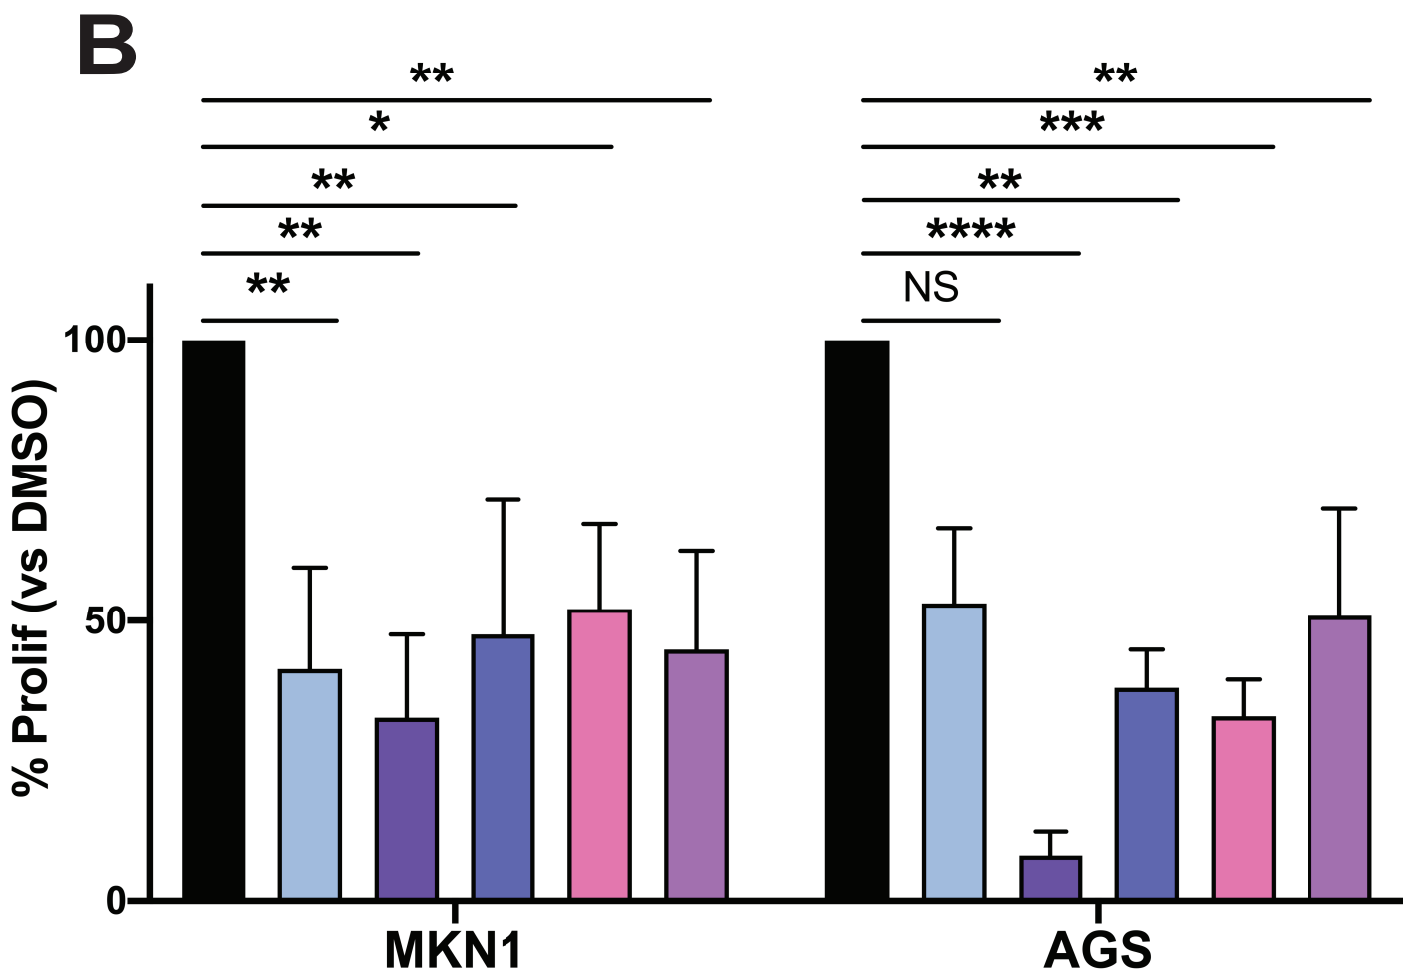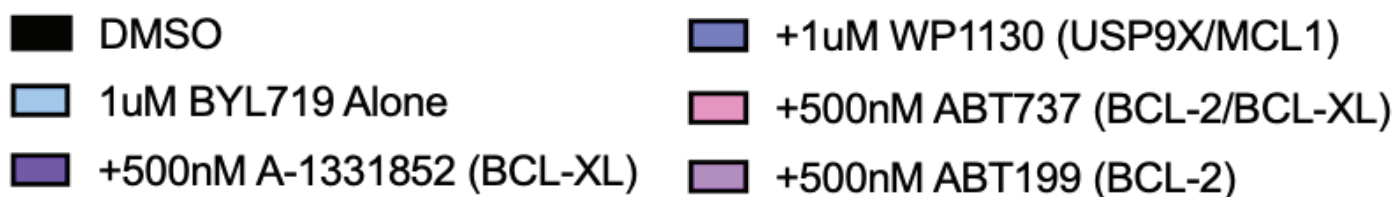

Supplement: NIHMS1917606-supplement-5.pdf [file NIHMS1917606-supplement-5.pdf]

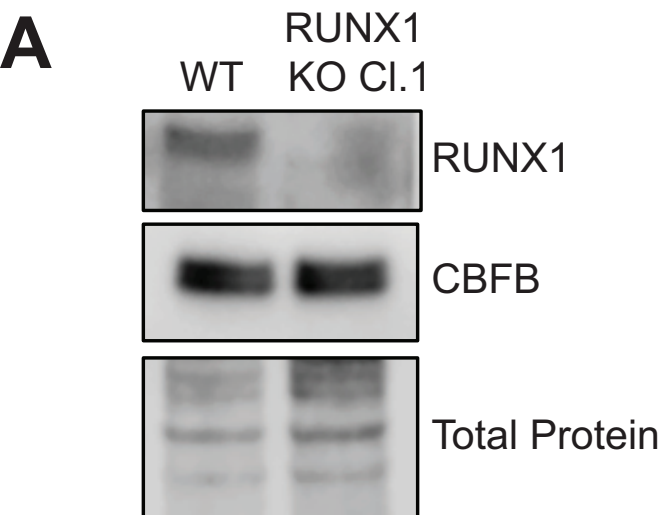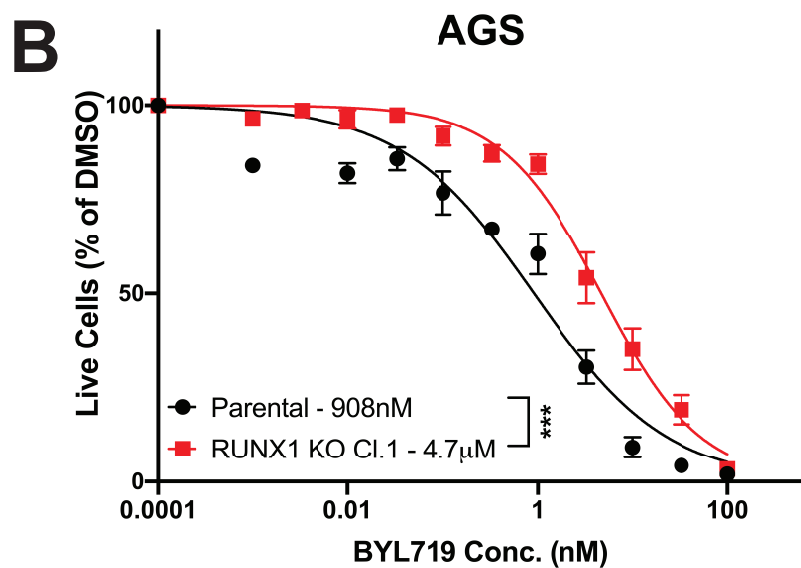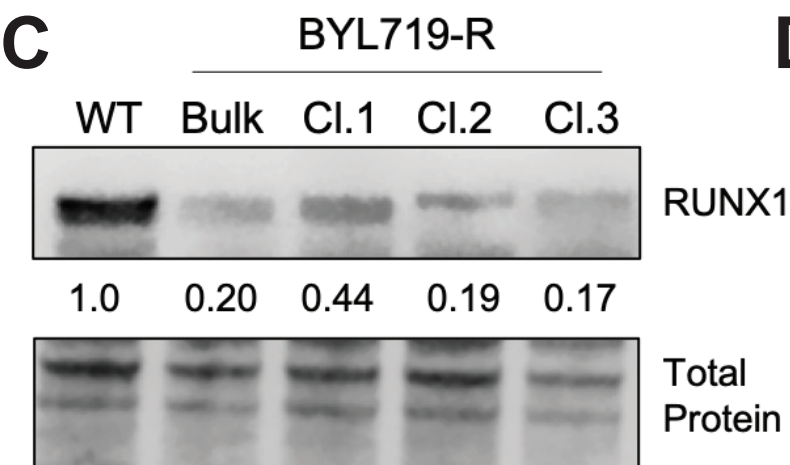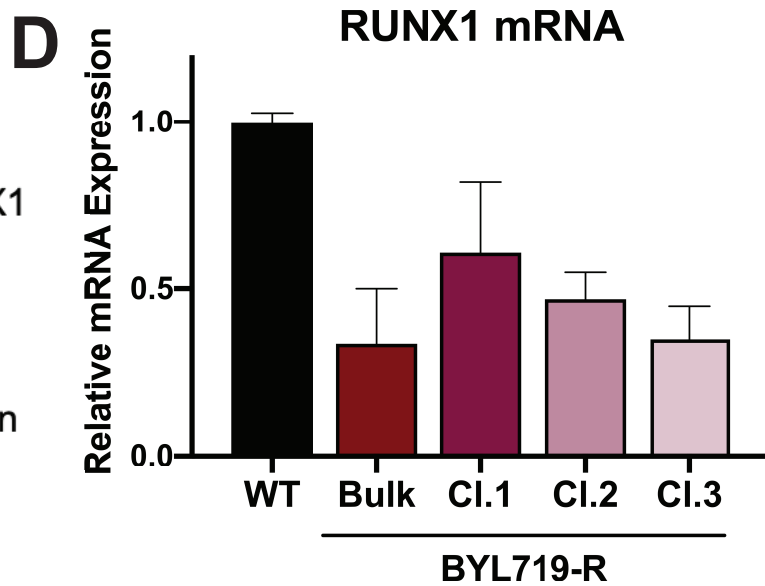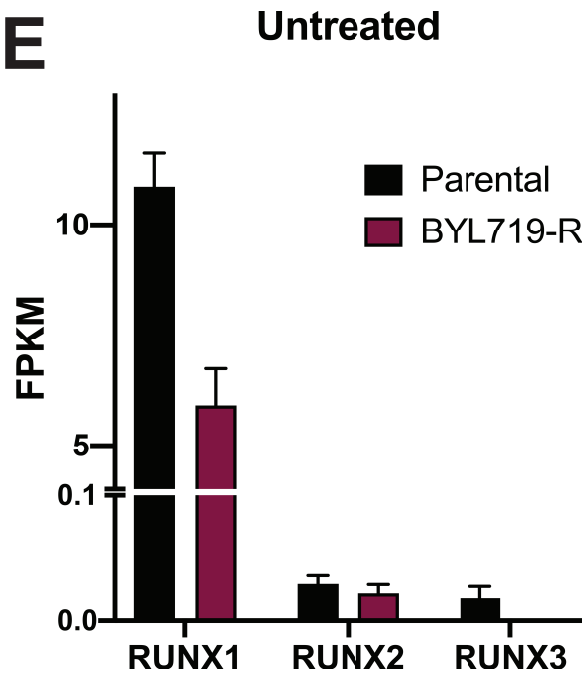

Supplement: NIHMS1917606-supplement-6.pdf [file NIHMS1917606-supplement-6.pdf]
